# Supplementary material for: Neuroprotective action of α-Klotho against LPS-activated glia conditioned medium in primary neuronal culture
Source: PubMed Central journal article supplement (PMC9640694; doi:10.1038/s41598-022-21132-4), 2022-11-07

Photomicrographs of laser confocal microscopy of the primary glial culture cells submitted to immunofluorescence with anti-GFAP, anti-MAP2, and anti-CD68 antibody and nuclear marker DAPI (A and D). The pattern of immunoreactivity to GFAP, astrocyte marker (B). Absence of neurons in glial culture Overlapping images of A and B, showing the presence of astrocytes in the glial culture (C). Immunoreactivity to CD68 is present in the glial culture (E). (F) Overlapping images of D and E, where we can observe a sample of the glial population, characterized by the presence of astrocytes and microglia.

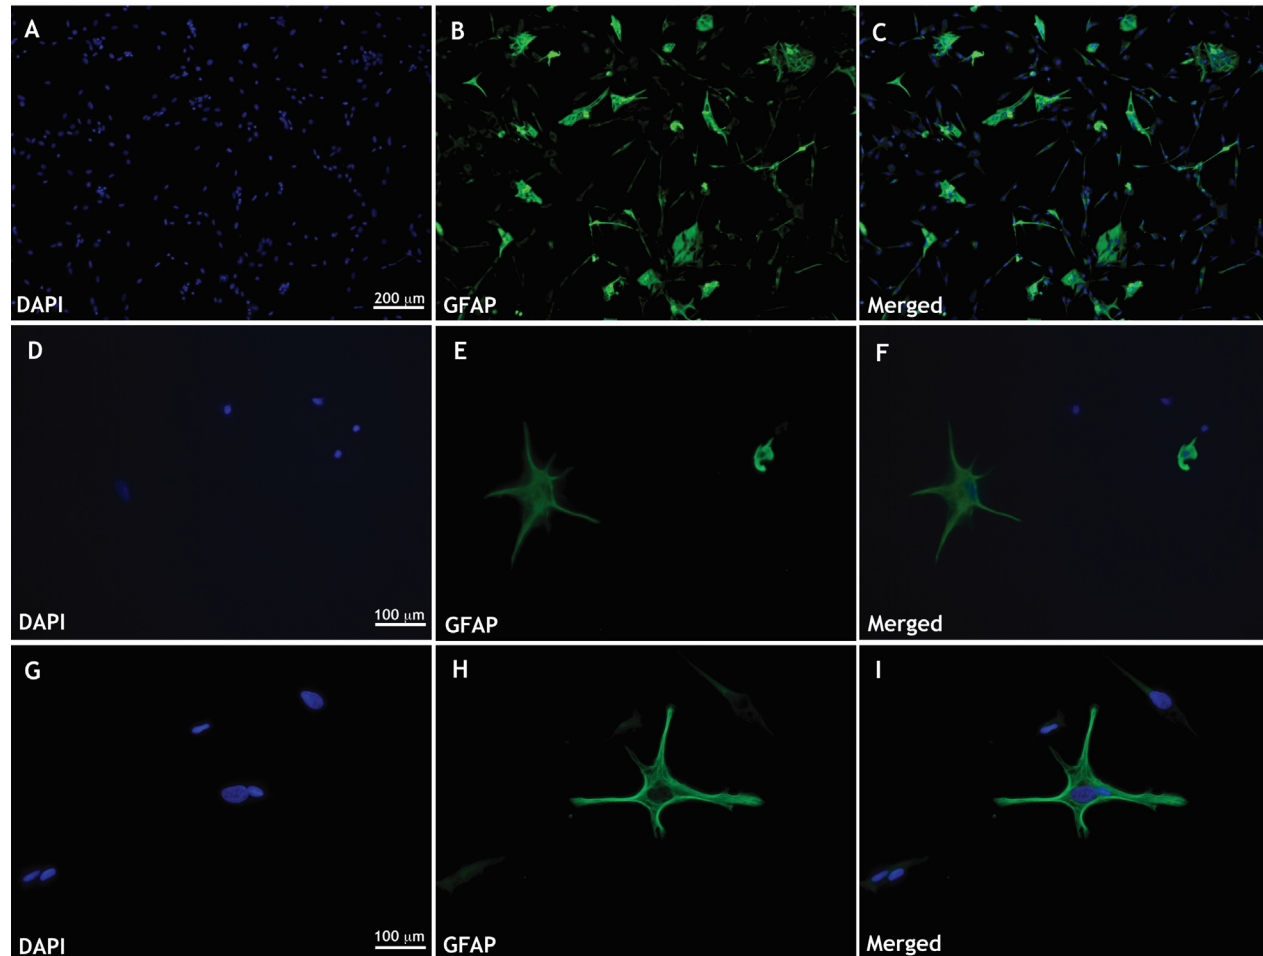

Photomicrographs of laser confocal microscopy of the primary neuronal culture cells submitted to immunofluorescence with Pan-Neuronal and NeuN antibodies and nuclear marker DAPI. Overlapping images of Pan-Neuronal and NeuN, showing the presence of neurons in the culture.

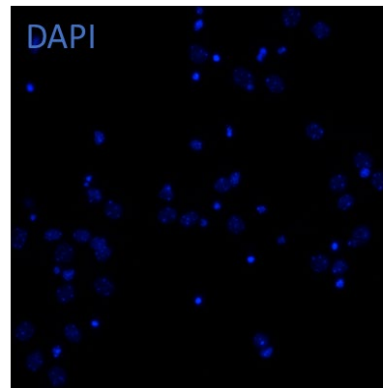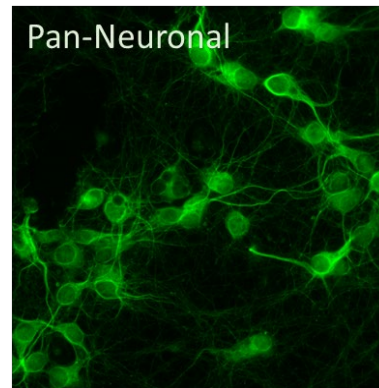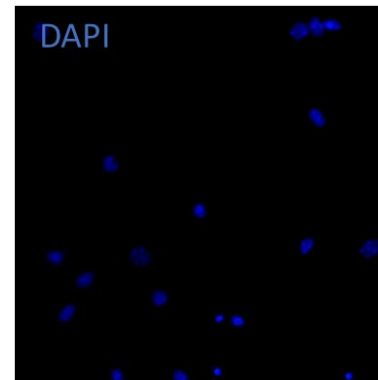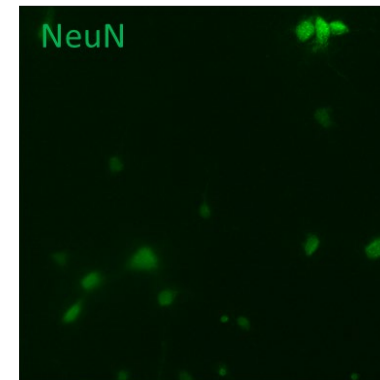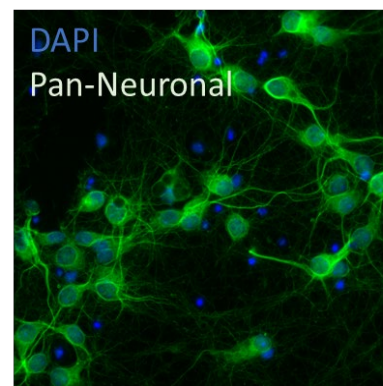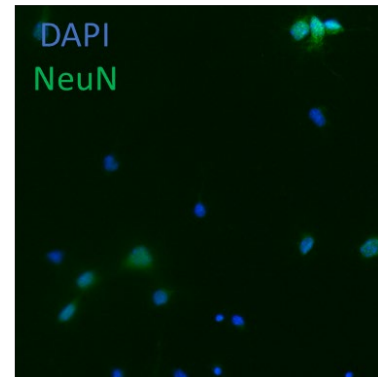

# EMSA assay to measure NF-kB activity

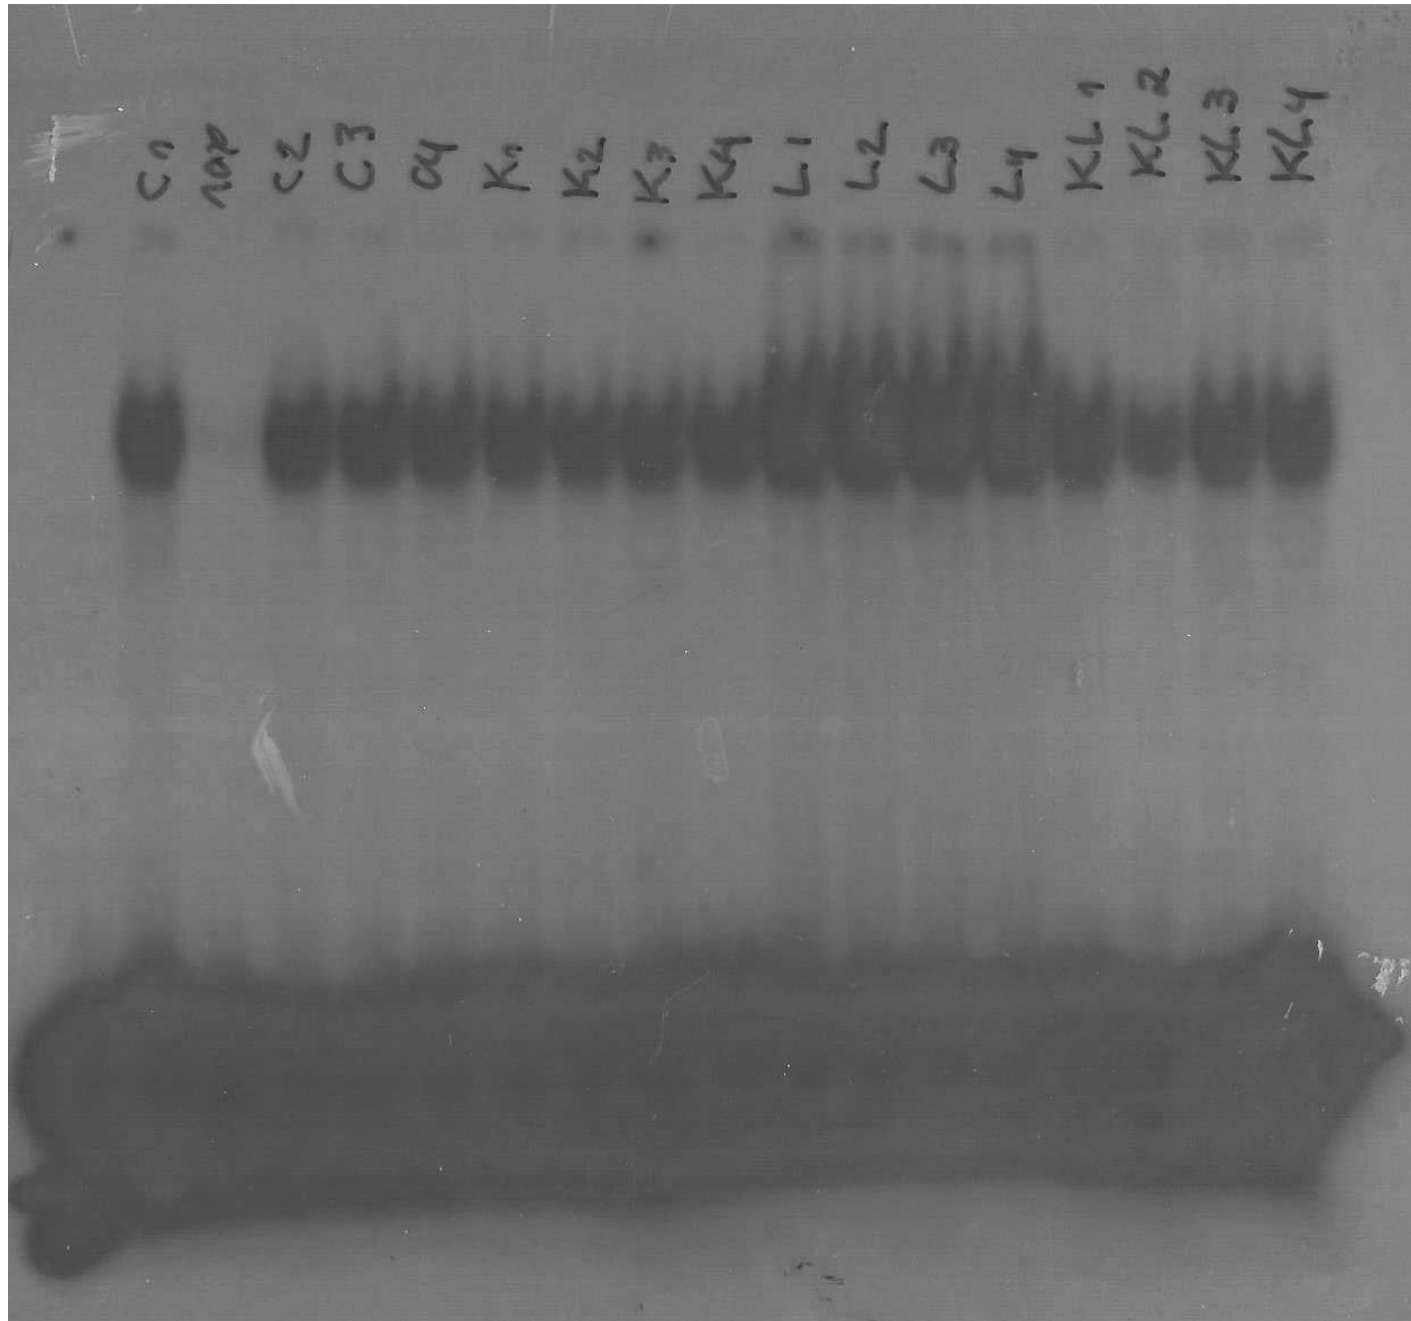

## Groups:

**C = Control**

**K = Klotho**

**L = LPS**

**KL = Klotho + LPS**

← **NF-kB  
(p65/p50)**

← **Free Probe**

# Super-shit EMSA assay to measure NF-kB activity

## Groups:

**C = Control**

**K = Klotho**

**L = LPS**

**KL = Klotho + LPS**

← **NF-kB**

← **Free Probe**

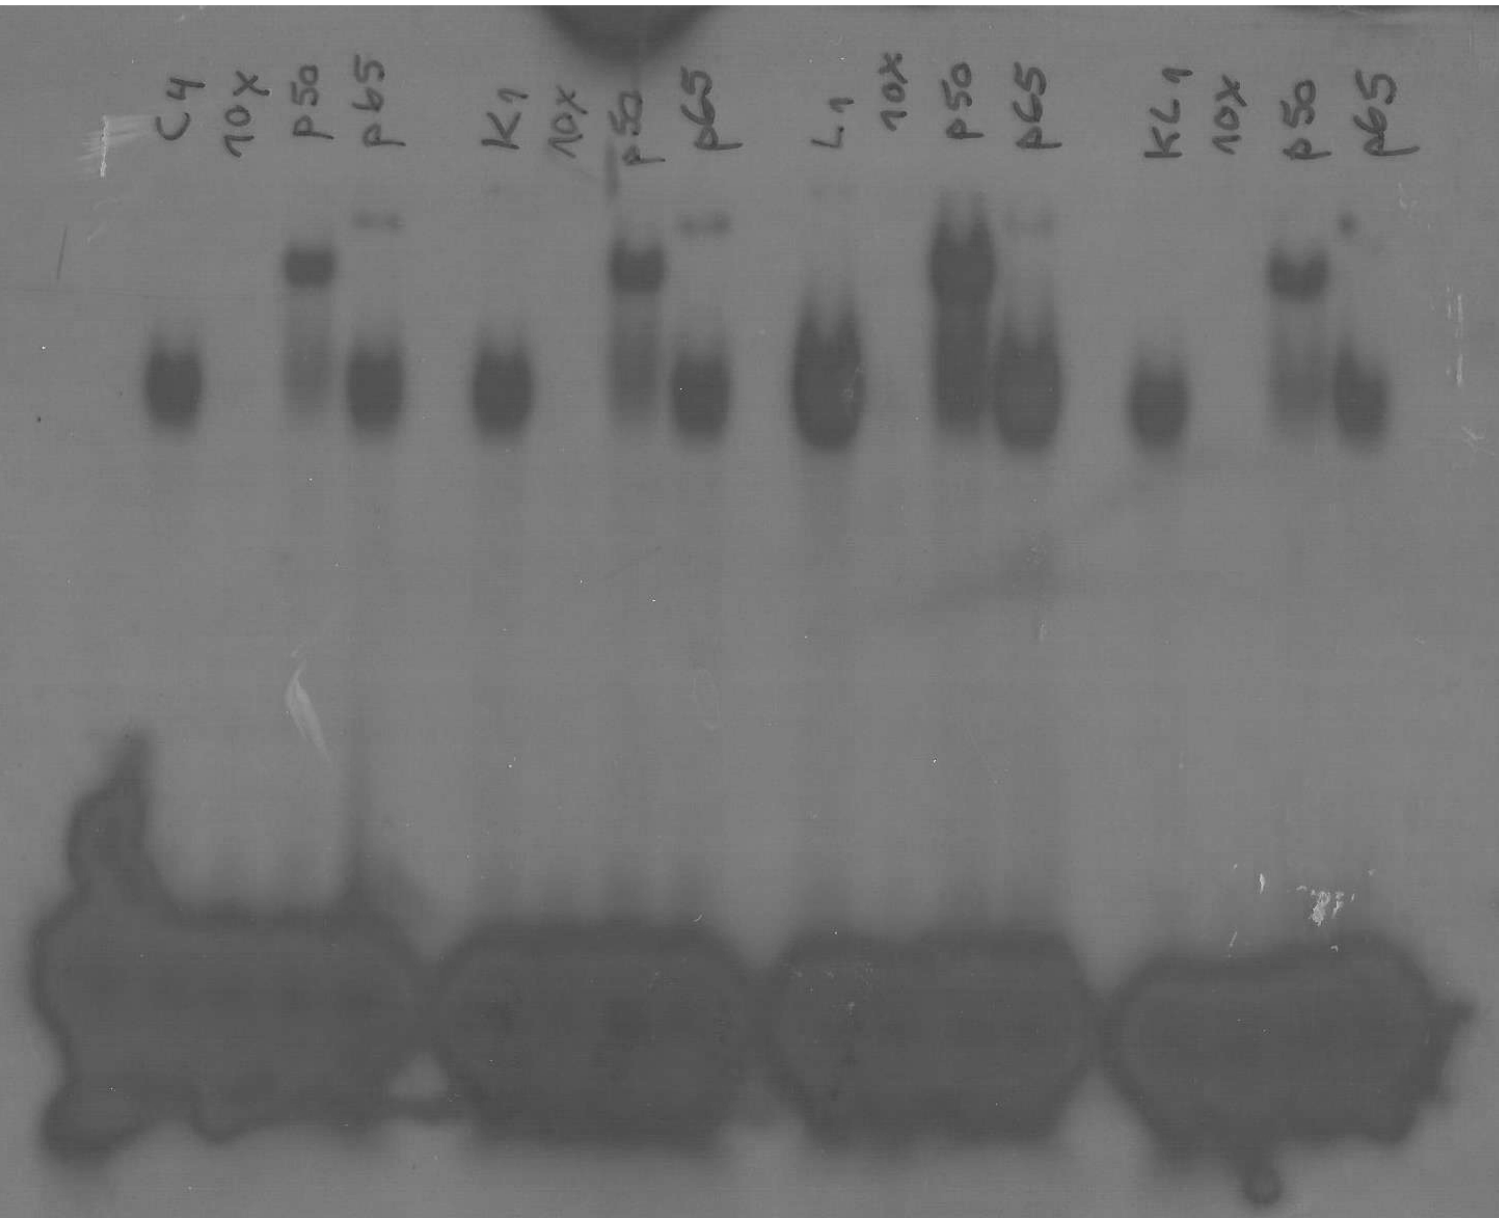

**Western blotting autoradiographs of RELA (p65) cytosolic and  $\beta$ -actin**

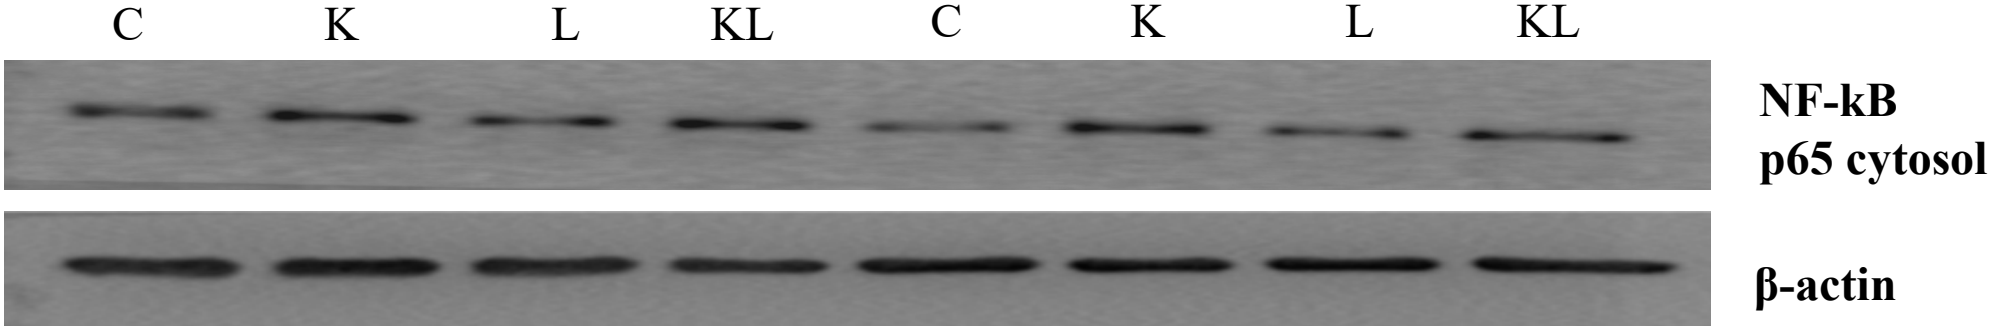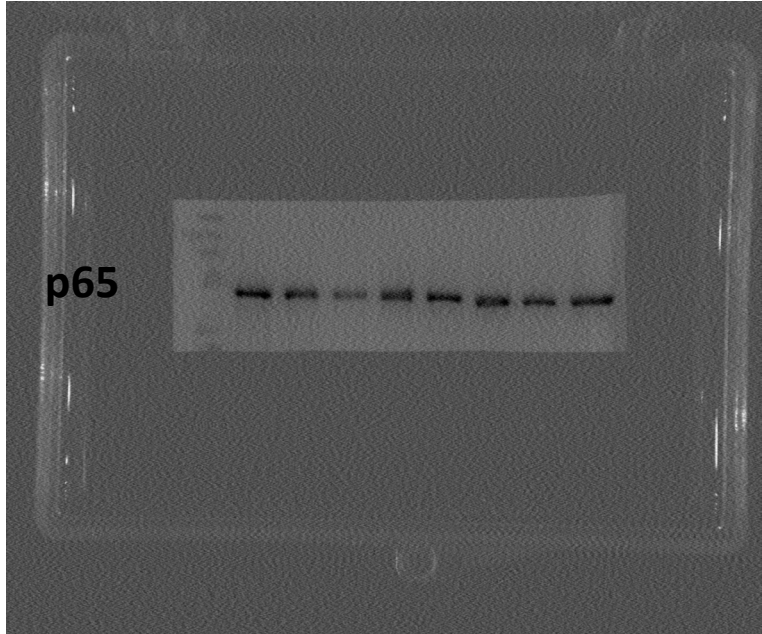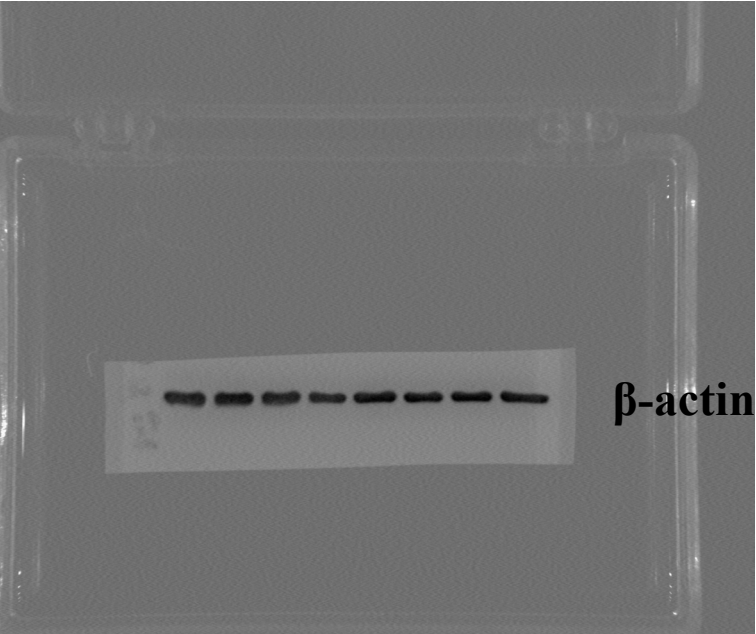

# Western blotting autoradiographs of RELA (p65) cytosolic and $\beta$ -actin

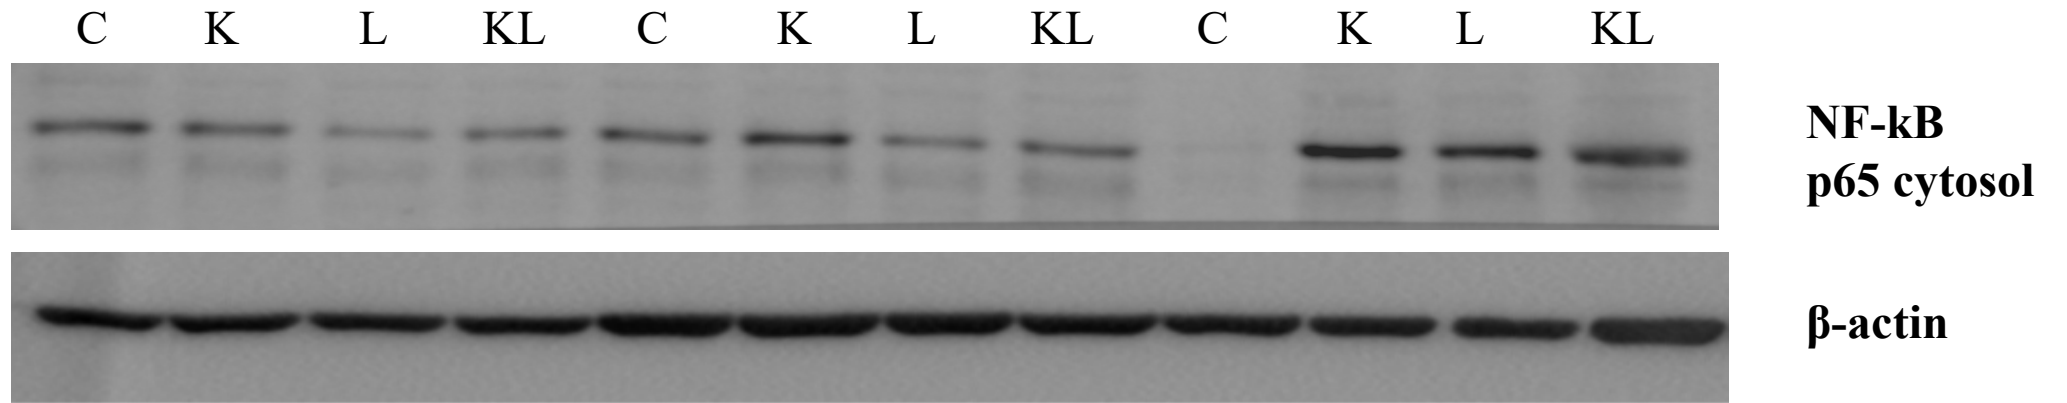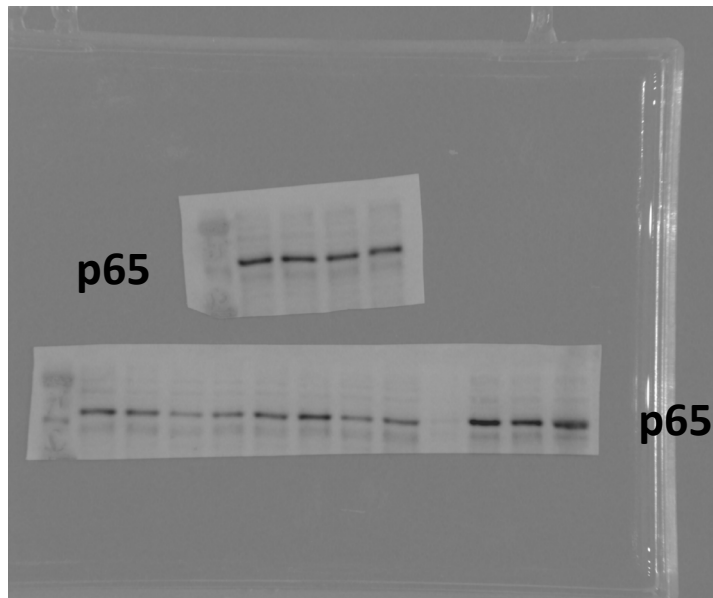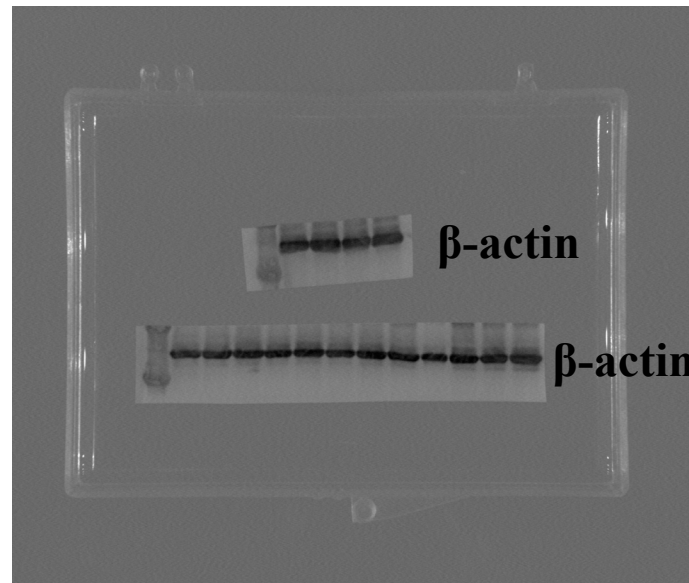

Supplement: 41598_2022_21132_MOESM1_ESM.pdf [file 41598_2022_21132_MOESM1_ESM.pdf]
